# Supplementary material for: Sequence analysis of SARS-CoV-2 genome reveals features important for vaccine design
Source: PubMed Central journal article supplement (PMC7519053; doi:10.1038/s41598-020-72533-2), 2020-09-24
Supplement: 41598_2020_72533_MOESM1_ESM.pdf [file 41598_2020_72533_MOESM1_ESM.pdf]

# Sequence analysis of SARS-CoV-2 genome reveals features important for vaccine design

Jacob Kames<sup>1</sup>, David D. Holcomb<sup>1</sup>, Ofer Kimchi<sup>2</sup>, Michael DiCuccio<sup>3</sup>, Nobuko Hamasaki-Katagiri<sup>1</sup>, Tony Wang<sup>4</sup>, Anton A. Komar<sup>5</sup>, Aikaterini Alexaki<sup>1,\*</sup> and Chava Kimchi-Sarfaty<sup>1,\*</sup>

<sup>1</sup> Center for Biologics Evaluation and Research, Office of Tissues and Advanced Therapies, Division of Plasma Protein Therapeutics, Food and Drug Administration, Silver Spring, MD, USA

<sup>2</sup> Harvard University School of Engineering and Applied Sciences

<sup>3</sup> National Center of Biotechnology Information, National Institutes of Health, Bethesda, MD, USA

<sup>4</sup> Center for Biologics Evaluation and Research, Office of Vaccines Research and Review, Division of Viral Products, Food and Drug Administration, Silver Spring, MD, USA

<sup>5</sup> Center for Gene Regulation in Health and Disease, Cleveland State University, Cleveland, OH, USA

Corresponding authors:

\*Chava Kimchi-Sarfaty, Ph.D.; Tel: +1 240 402-8203; [Chava.kimchi-sarfaty@fda.hhs.gov](mailto:Chava.kimchi-sarfaty@fda.hhs.gov);

Division of Plasma Protein Therapeutics, Office of Tissue and Advanced Therapies, Center for Biologics Evaluation and Research, Food and Drug Administration, Silver Spring, USA

Correspondence may also be addressed to,

\*Aikaterini Alexaki, Ph.D.; Tel: +1 240 402 7072; [Aikaterini.alexaki@fda.hhs.gov](mailto:Aikaterini.alexaki@fda.hhs.gov); Division of Plasma Protein Therapeutics, Office of Tissue and Advanced Therapies, Center for Biologics Evaluation and Research, Food and Drug Administration, Silver Spring, USA

# Supplemental Figure 1

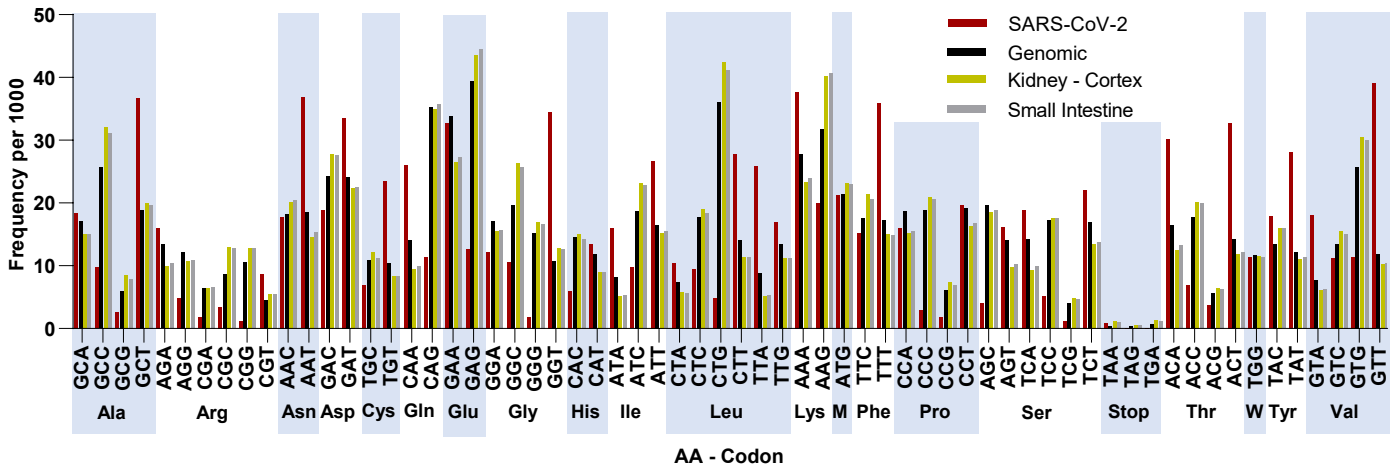

**Supplemental Figure 1** – Codon frequencies per 1000 for SARS-CoV-2 (Red), *Homo sapiens* (Genomic, Black), Kidney (Cortex, Yellow) and Small Intestine (Terminal Ileum, grey). Codons are grouped by the amino acid they encode (alternating light blue columns, Met and Trp represented as single letter).

# Supplemental Figure 2

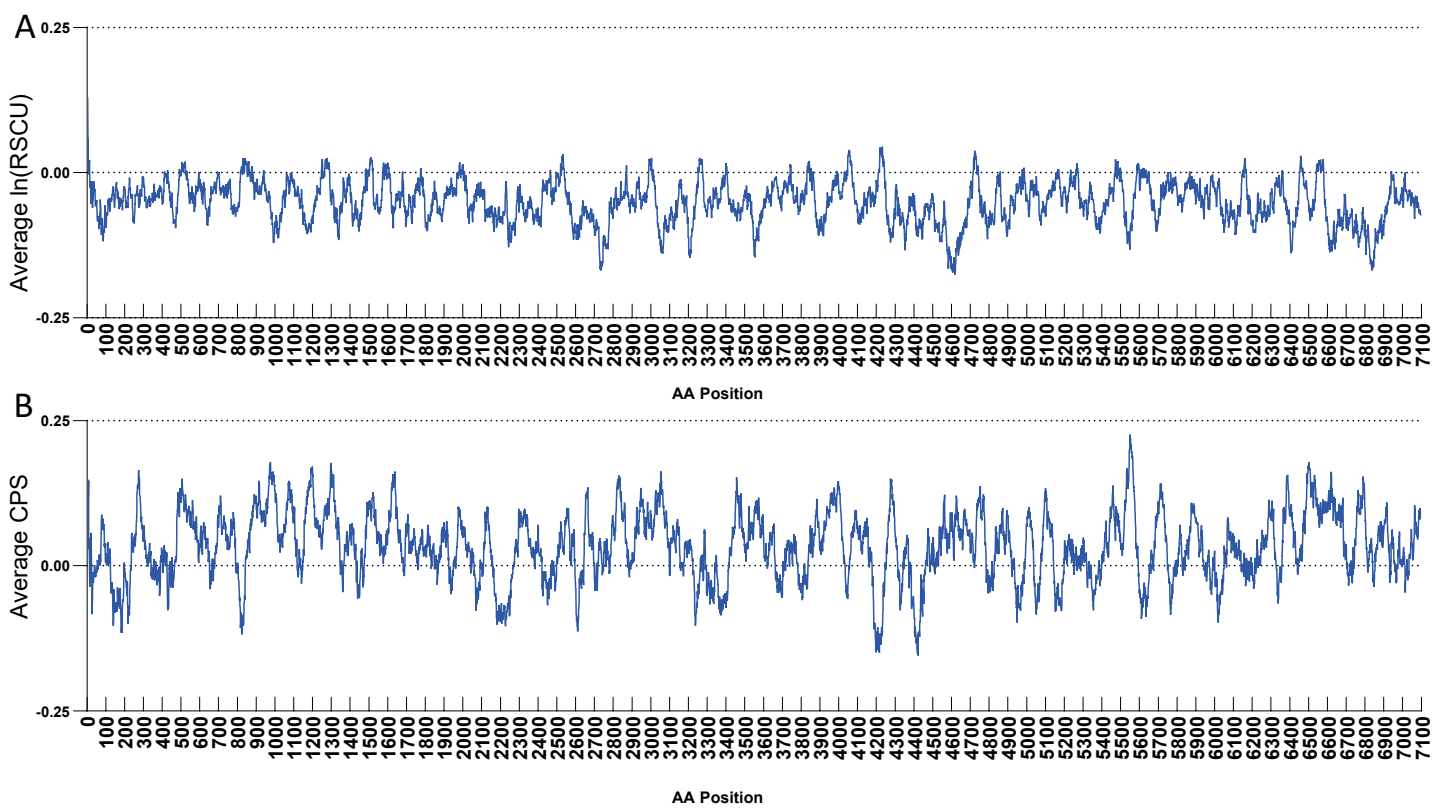

**Supplemental Figure 2** – Fifty codon sliding window average of  $\ln(\text{RSCU})$  (A) and codon pair score (CPS) (B) of SARS-CoV-2 ORF1ab. RSCU and CPS are calculated based on *Homo sapiens* genomic codon and codon pair usage.
